# Supplementary material for: Sequestration of synaptic proteins by alpha-synuclein aggregates leading to neurotoxicity is inhibited by small peptide
Source: PubMed Central journal article supplement (PMC5880409; doi:10.1371/journal.pone.0195339), 2018-04-02

S7 Fig

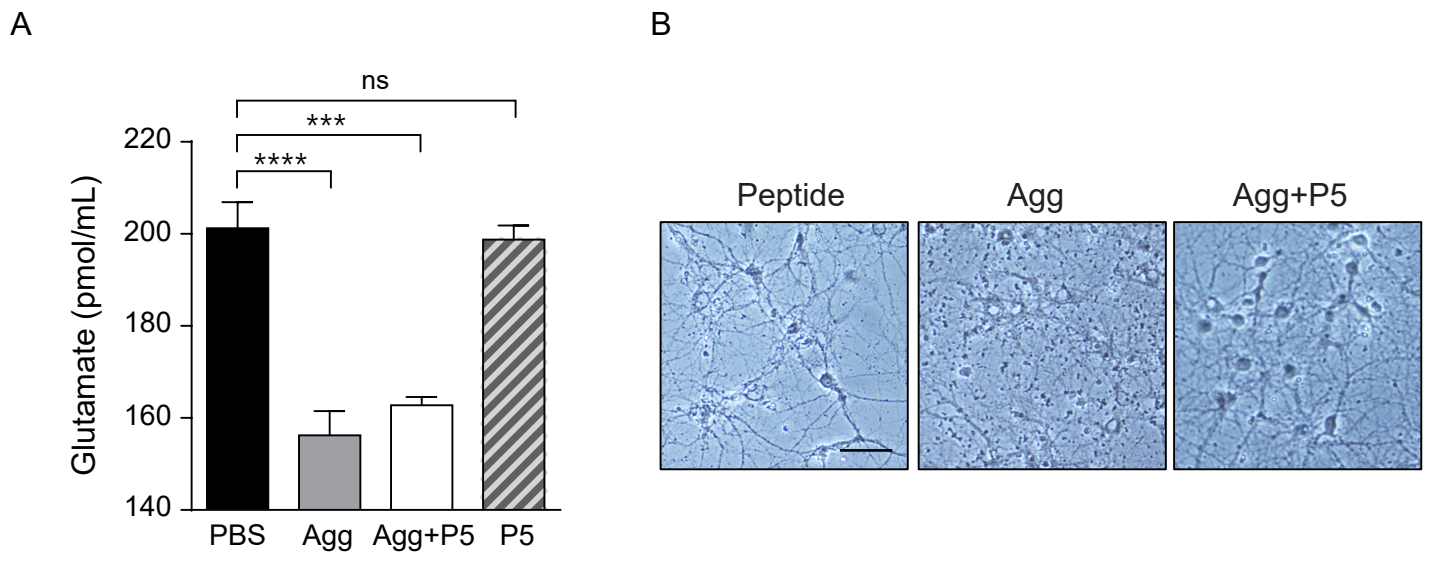

Supplement: pone.0195339.s008.pdf [file pone.0195339.s008.pdf]
