# Supplementary material for: Sequestration of synaptic proteins by alpha-synuclein aggregates leading to neurotoxicity is inhibited by small peptide
Source: PubMed Central journal article supplement (PMC5880409; doi:10.1371/journal.pone.0195339), 2018-04-02
Supplement: pone.0195339.s009.pdf [file pone.0195339.s009.pdf]

S8 Fig

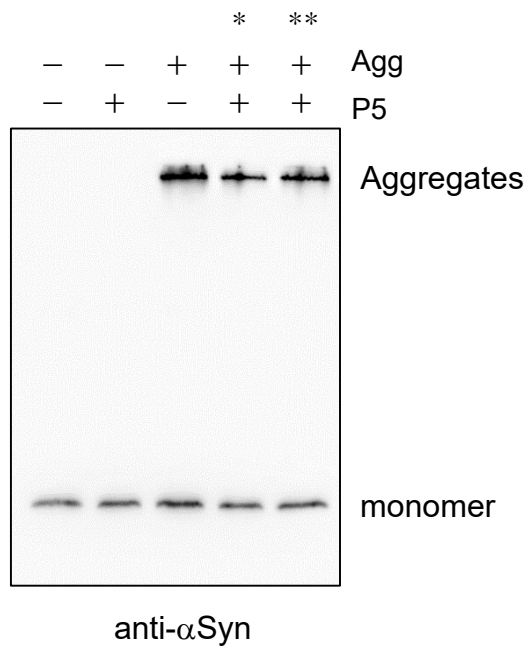

\* ; Pre-treatment of P5 to the cell before Agg addition

\*\* ; Pre-incubation of P5 with Agg before treatment to the cell
